# Supplementary material for: Involvement of local renin‐angiotensin system in immunosuppression of tumor microenvironment
Source: PubMed Central journal article supplement — Cancer Sci. 2017 Nov 9;109(1):54–64. doi: 10.1111/cas.13423 (PMC5765296; doi:10.1111/cas.13423), 2017-11-09
Supplement: CAS-109-54-s002.pdf [file CAS-109-54-s002.pdf]

**Fig. S1 The phenotype of sorted CAF.**

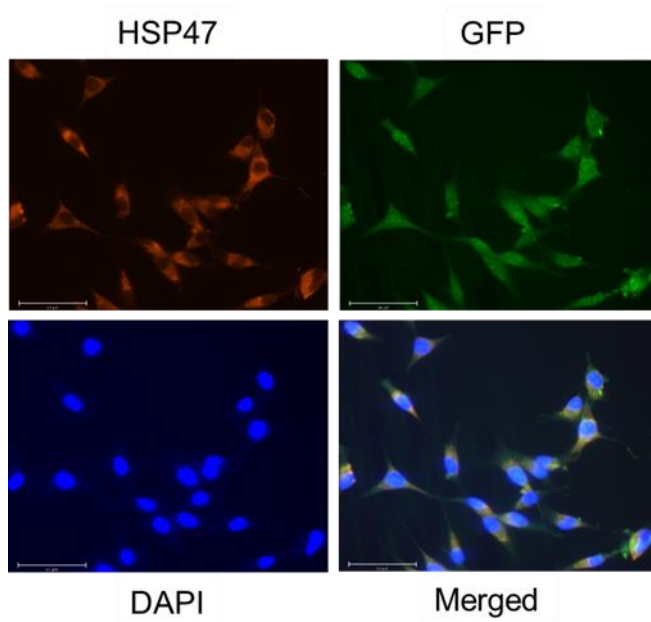

The expression of HSP47, a fibroblast marker, in sorted CAF was evaluated by fluorescent immunostaining after culturing sorted CAF for one day.
