# Supplementary material for: Involvement of local renin‐angiotensin system in immunosuppression of tumor microenvironment
Source: PubMed Central journal article supplement — Cancer Sci. 2017 Nov 9;109(1):54–64. doi: 10.1111/cas.13423 (PMC5765296; doi:10.1111/cas.13423), 2017-11-09
Supplement: CAS-109-54-s003.pdf [file CAS-109-54-s003.pdf]

**Fig. S2 RAS did not affect the proliferation of murine colorectal carcinoma cell lines, MC38 and CT26.**

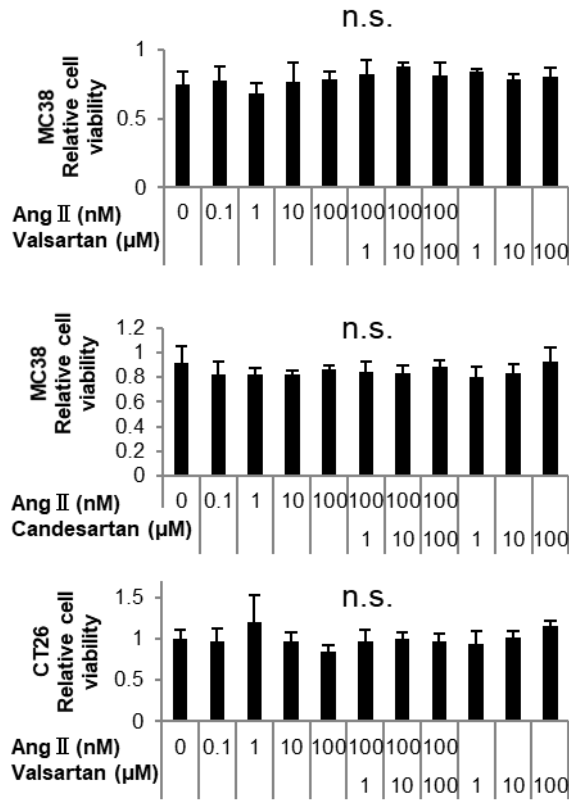

MC38 and CT26 cells were seeded in flat-bottom 96-well plates and treated with various concentrations of angiotensin II and valsartan or candesartan for 72 h. Cell viability was determined using the cell proliferation reagent WST-1. All data are from three independent experiments. Error bars indicate SD.
