# Supplementary material for: Involvement of local renin‐angiotensin system in immunosuppression of tumor microenvironment
Source: PubMed Central journal article supplement — Cancer Sci. 2017 Nov 9;109(1):54–64. doi: 10.1111/cas.13423 (PMC5765296; doi:10.1111/cas.13423), 2017-11-09
Supplement: CAS-109-54-s004.pdf [file CAS-109-54-s004.pdf]

**Fig. S3 Valsartan showed little effect on the number of tumor infiltrating T cells.**

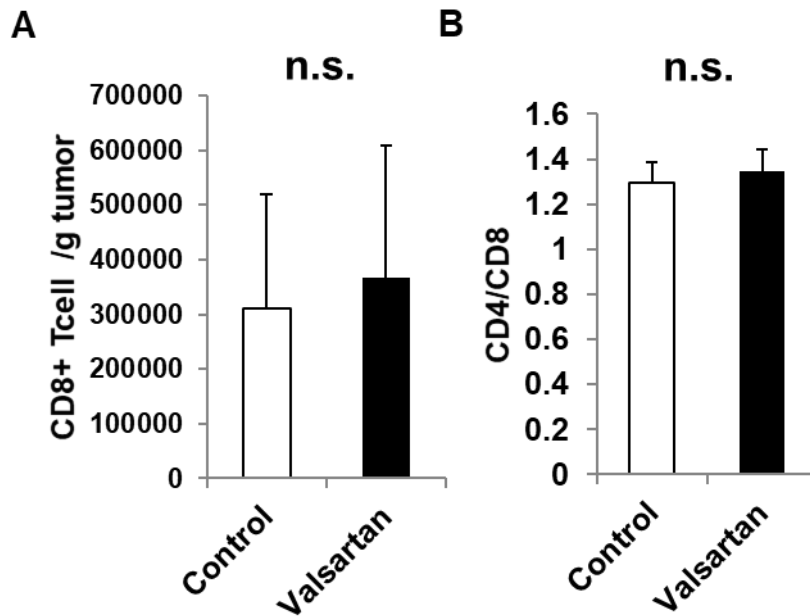

**A and B.** Tumor infiltrating CD8<sup>+</sup> or CD4<sup>+</sup> T cells were analyzed by FACS.

The absolute number of the CD8<sup>+</sup> T cells (A) and ratio of CD4<sup>+</sup> T cells to CD8<sup>+</sup> T cells were shown (B). All data are from three independent experiments.

Error bars indicate SD.
