# Supplementary material for: Involvement of local renin‐angiotensin system in immunosuppression of tumor microenvironment
Source: PubMed Central journal article supplement — Cancer Sci. 2017 Nov 9;109(1):54–64. doi: 10.1111/cas.13423 (PMC5765296; doi:10.1111/cas.13423), 2017-11-09
Supplement: CAS-109-54-s005.pdf [file CAS-109-54-s005.pdf]

**Fig. S4 The effect of valsartan on TAM, MDSC, DC and endothelial cells in MC38-bearing mouse.**

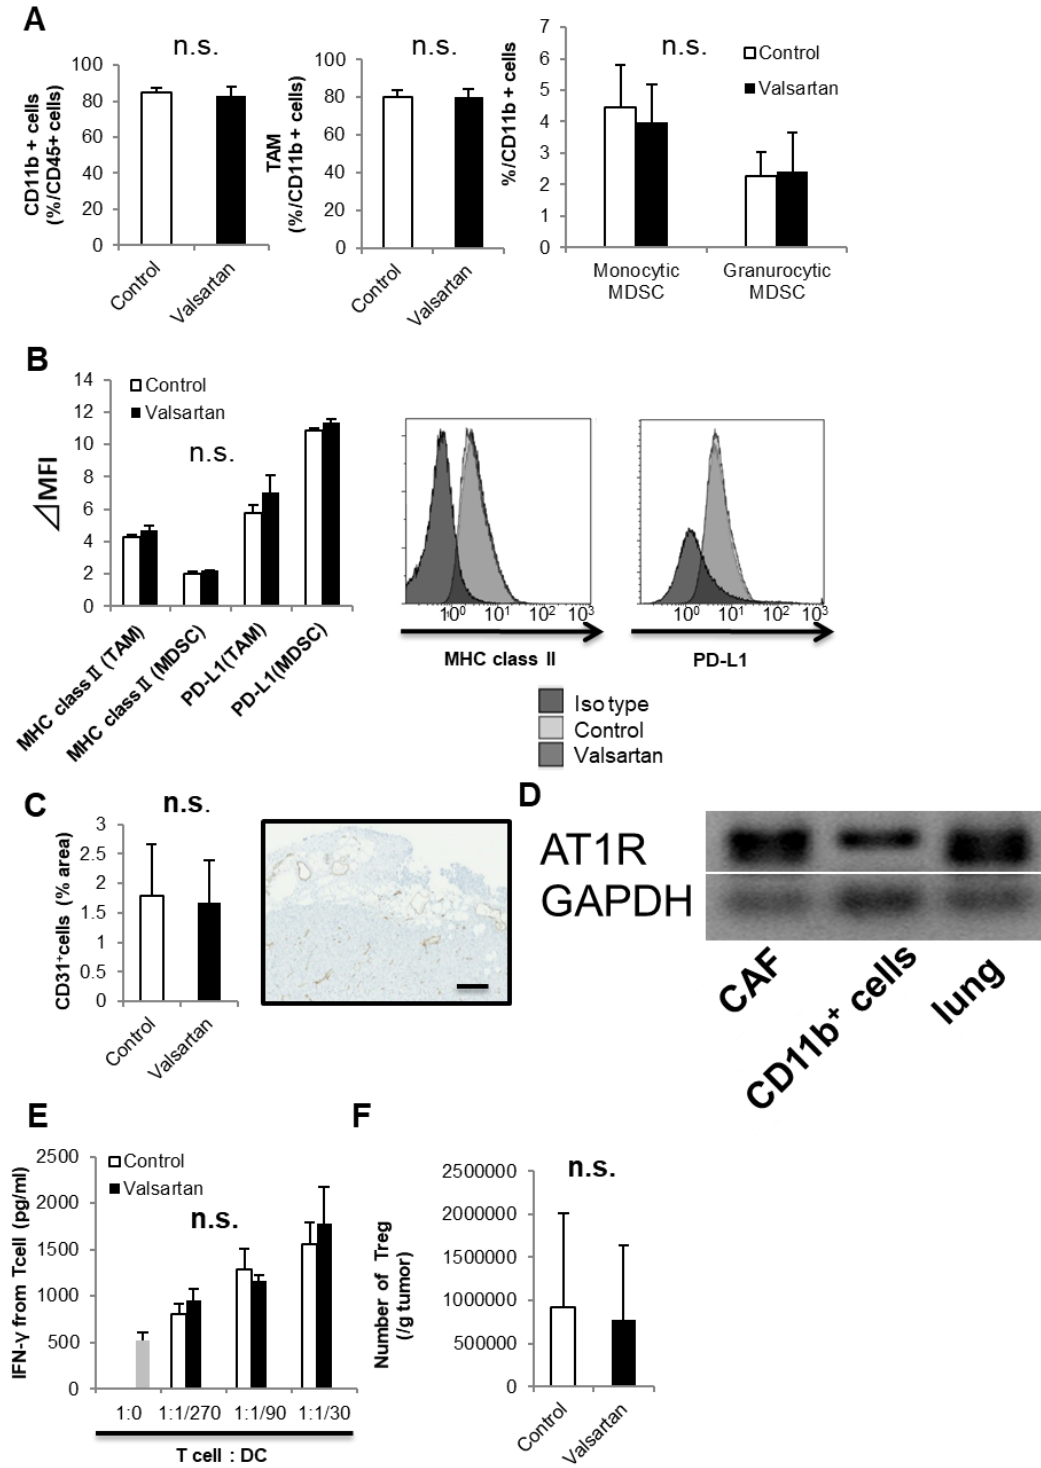

**A.** Ratio of tumor-infiltrating CD11b<sup>+</sup> cells and their each cell fraction (TAM; CD11b<sup>+</sup> F4/80<sup>+</sup>, monocytic MDSC; CD11b<sup>+</sup>, F4/80<sup>-</sup>, Ly-6c<sup>+</sup>, Ly-6g<sup>-</sup>, granulocytic MDSC; CD11b<sup>+</sup>, F4/80<sup>-</sup>, Ly-6c<sup>-</sup>, Ly-6g<sup>+</sup>) were measured by flow cytometry. All data are from three independent experiments. Error bars indicate SD.

**B.** The expression of MHC class II and PD-L1 on tumor-infiltrating CD11b<sup>+</sup> cells was measured by flow cytometry. All data are from three independent experiments. Error bars indicate SD.

**C.** CD31<sup>+</sup> cells in tumors were assessed by immunohistochemistry. Scale bar is 100 μm. A minimum of 10 randomly selected fields were captured at 200x magnification for each section using a NanoZoomer and imported into a computerized image analysis system, Image J. Error bars indicate SD.

**D.** The tumor-infiltrating CD11b<sup>+</sup> cells and CAFs from the MC38 tumor tissue express mRNA of AT1R by PCR.

**E.** DCs from draining lymph nodes were irradiated and cocultured with T cells from C57BL/6 mice in the presence of anti-CD3-Ab for 3 days. IFN-γ production was determined to measure T cell activation. T cells incubated without DCs (1:0) served as a negative control. All data are from three independent experiments. Error bars indicate SD.

**F.** The number of regulatory T cells in tumors was measured by flow cytometry.

All data are from two independent experiments. Error bars indicate SD.
