# Supplementary material for: Involvement of local renin‐angiotensin system in immunosuppression of tumor microenvironment
Source: PubMed Central journal article supplement — Cancer Sci. 2017 Nov 9;109(1):54–64. doi: 10.1111/cas.13423 (PMC5765296; doi:10.1111/cas.13423), 2017-11-09
Supplement: CAS-109-54-s006.pdf [file CAS-109-54-s006.pdf]

Fig. S5 PD-L1 expression in CAF.

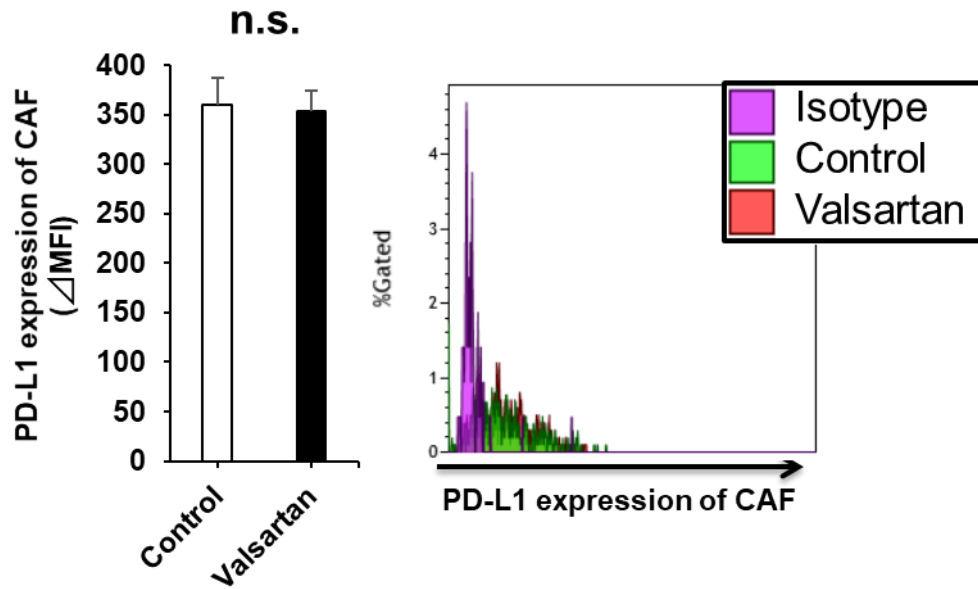

PD-L1 expression of sorted CAFs from ARB-administered group and the control group was evaluated by FACS.
